# Supplementary material for: Mutation in the Endo-β-1,4-glucanase (KORRIGAN) Is Responsible for Thick Leaf Phenotype in Sorghum
Source: MDPI journal article supplement (doi:10.3390/plants11243531), 2022-12-15
Supplement: s1 [file s1]

(A) Gene structure of Arabidopsis *KOR* (AT5G49720 )

Chromosome-05

20197391

20200468

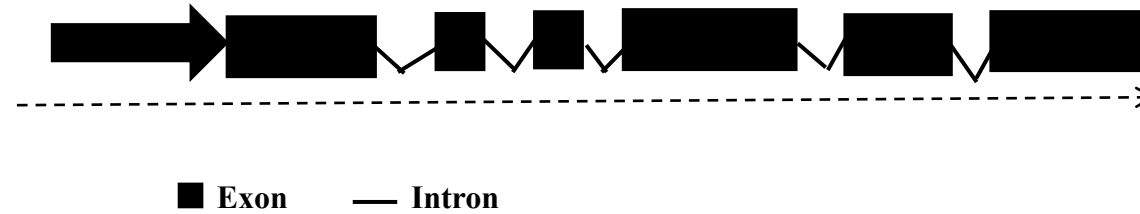

(B) Gene structure of Sorghum *KOR1* / *SbKOR1* (Sb01g036480)

Chromosome-01

67200204

67206863

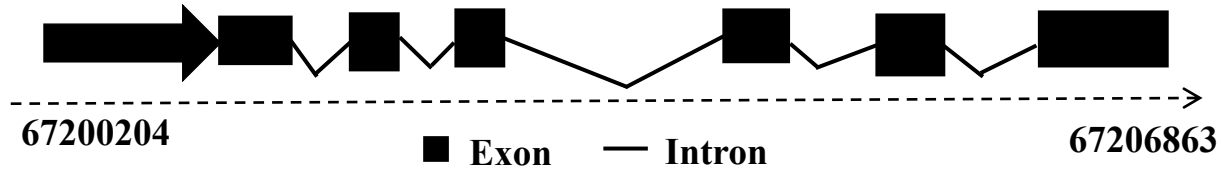

WT 620 aa

*thl1* Q46\*

Supplementary Figure S1: Gene structure of *AtKOR* (AT5G49720) and *SbKOR1* (Sb01g036480) with 6 exons and 5 introns.

CLUSTAL O(1.2.4) multiple sequence alignment

```

ATKOR      --MYGRDPWGGPLEINTADSATDDDRSRNLNDLDRAALSRLPDETTQSWLLGP---TEQK 55
SB01G036480 MSMYGRDPWGGPLETCHPDSATDDDRSRNL-DIDRGAMSRTLDETQQSWLLAGPGDQARK 59
              *****          *****  *:*:*:*  *****          :*

```

```

ATKOR      KKKYVDLGCIIIVSRKIFVWTVGTLVAAALLAGFITLIVKTVPRHHPKTPPPDNYTIALHK 115
SB01G036480 KKKYVDIGCLVVSRLKLFVWTLGVLLAAAVFAGVVAGIAKAIPRRHRPPPPDDYTVALHK 119
              *****:*:*:*:*:*:*:*:*:*:*:*:*:*:*:*:*:*:*:*:*:*:*:*:*:*:*:*

```

```

ATKOR      ALKFFNAQKSGKLPKHNNVSWRGNSGLQDGKGETGSFYKDLVGGYYDAGDAIKFNFPMA 175
SB01G036480 ALMFFNAQKSGKLPKHNNIPWRGNMCKDGLSDP-AVRRSLVGGYYDAGGAVKFNFPAAF 178
              **  *****:*:*:*:*:*:*:*:*:*:*:*:*:*:*:*:*:*:*:*:*:*:*:*

```

```

ATKOR      AMTMLSWSVIEYSAKYEAAGELTHVKELIKWGTDFLKTFFNSTADSIDDLVSQVSGNTD 235
SB01G036480 SMTLLSWSVIEYSAKYDAVGELGHVRDIIKWGSDYFLKTFNSTADSIDRVIAQVGSAA 238
              :*:*:*:*:*:*:*:*:*:*:*:*:*:*:*:*:*:*:*:*:*:*:*:*:*:*:*

```

```

ATKOR      DGNTDPNDHYCWMRPEDMDYKRPVTTGNGGCSDLAAEMAAALASASIVFKDNKEYSKKL 295
SB01G036480 PGSTQPNDDQYCWMRPEDIDYPRPVVECH-ACSDLAAEMAAALAAASIVFKDNKAYSQKL 297
              *:*:*:*:*:*:*:*:*:*:*:*:*:*:*:*:*:*:*:*:*:*:*:*:*:*

```

```

ATKOR      HGAKVVYQFGRTRRGYSAGTAESSKFYNSSMYWDEFIWGGAWMYATGNVTYLNLTQP 355
SB01G036480 HGATTLFQFARERRGRYSAGGSDATKFYNSTSYWDEFVWGSSWMYLATGNSSYLTATHP 357
              ***..*:*:*:*  *****  :*:*:*:*:*:*:*:*:*:*:*:*:*:*:*:*:*

```

```

ATKOR      TMAKHAGAFWGGPYGVFSWDNKLAGAQLLLSRLRLFLSPGYPYEEILRTFHNQTSIVMC 415
SB01G036480 KLAKHAGAFWGGPDYGVFSWDNKLTGAQVLLSRLRLFLSPGYPYEEMLRAFHNQTSIIMC 417
              .:*:*:*:*:*:*  *****:*:*:*:*:*:*:*:*:*:*:*:*:*:*:*

```

```

ATKOR      SYLPPIFNKFNRTNGGLIELNHGAPQLQYSVNAAFLATLYSDYLDAAADTPGWYCGPNFY 475
SB01G036480 SYLPPIFKSFNRTRGGLIQLNHGKQPLQYVVNAAFSLASVFSYDLEAADTPGWYCGPHFY 477
              *****:*  *****  *****:*:*:*:*:*:*:*:*:*:*:*:*

```

```

ATKOR      TSVLRDFARSQIDYILGKNPRKMSYVVGFGTKYPRHVHHRGASIPKNKVYNCKGGWKWR 535
SB01G036480 IEVLRSFARTQIEYILGKNPLKMSYVVGFGNHYPKHVHHRGASIPKNGVHYGCKGGWKWR 537
              .***.*:*:*:*:*  *****  .:*:*:*:*:*:*:*:*:*:*:*:*

```

```

ATKOR      DSKKPNPNTIEGAMVAGPDKRDGYRDVRMNYNYTEPTLAGNAGLVAALVALSGEEEATGK 595
SB01G036480 DTKKPNPNIIVGAMVAGPDRHDFKDKARKNYNYTEATLVGNAGLVAALVALSGEGH---G 594
              *:*:*:*:*  *****:*:*:*:*  *****  *:*:*:*:*

```

```

ATKOR      IDKNTIFSAPVPLFPPTPPPPAPWKP 621
SB01G036480 VDKNAMFSAPVPMFPPSPPPPPAPWKP 620
              :*:*:*:*:*:*:*:*:*:*:*:*:*

```

CLUSTAL O(1.2.4) multiple sequence alignment

```

ATKOR      --MYGRDPWGGPLEINTADSATDDDRSRNLNDLDRAALSRLPDETTQSWLLGPTEQKKK 58
th12      MSMYGRDPWGGPLEICHPDSATDDDRSRNL-DIDRGAMSRTLDETQ----- 45
              *****          *****  *:*:*:*  *****

```

```

ATKOR      YVDLGCIIIVSRKIFVWTVGTLVAAALLAGFITLIVKTVPRHHPKTPPPDNYTIALHK 118
th12      ----- 45

```

```

ATKOR      FFNAQKSGKLPKHNNVSWRGNSGLQDGKGETGSFYKDLVGGYYDAGDAIKFNFPMA 178
th12      ----- 45

```

```

ATKOR      MLSWSVIEYSAKYEAAGELTHVKELIKWGTDFLKTFFNSTADSIDDLVSQVSGNTDDGN 238
th12      ----- 45

```

```

ATKOR      TDPNDHYCWMRPEDMDYKRPVTTGNGGCSDLAAEMAAALASASIVFKDNKEYSKKL 298
th12      ----- 45

```

```

ATKOR      KVVYQFGRTRRGYSAGTAESSKFYNSSMYWDEFIWGGAWMYATGNVTYLNLTQPTMA 358
th12      ----- 45

```

```

ATKOR      KHAGAFWGGPYGVFSWDNKLAGAQLLLSRLRLFLSPGYPYEEILRTFHNQTSIVMC 418
th12      ----- 45

```

```

ATKOR      PIFNKFNRNTNGGLIELNHGAPQLQYSVNAAFLATLYSDYLDAAADTPGWYCGPNFY 478
th12      ----- 45

```

```

ATKOR      LRDFARSQIDYILGKNPRKMSYVVGFGTKYPRHVHHRGASIPKNKVYNCKGGWKWR 538
th12      ----- 45

```

```

ATKOR      KPNPNTIEGAMVAGPDKRDGYRDVRMNYNYTEPTLAGNAGLVAALVALSGEEEATGK 598
th12      ----- 45

```

```

ATKOR      NTIFSAPVPLFPPTPPPPAPWKP 621
th12      ----- 45

```

Supplementary Figure S2: Alignment of AtKOR1 and Sb01G036480 (SbKOR1) proteins.

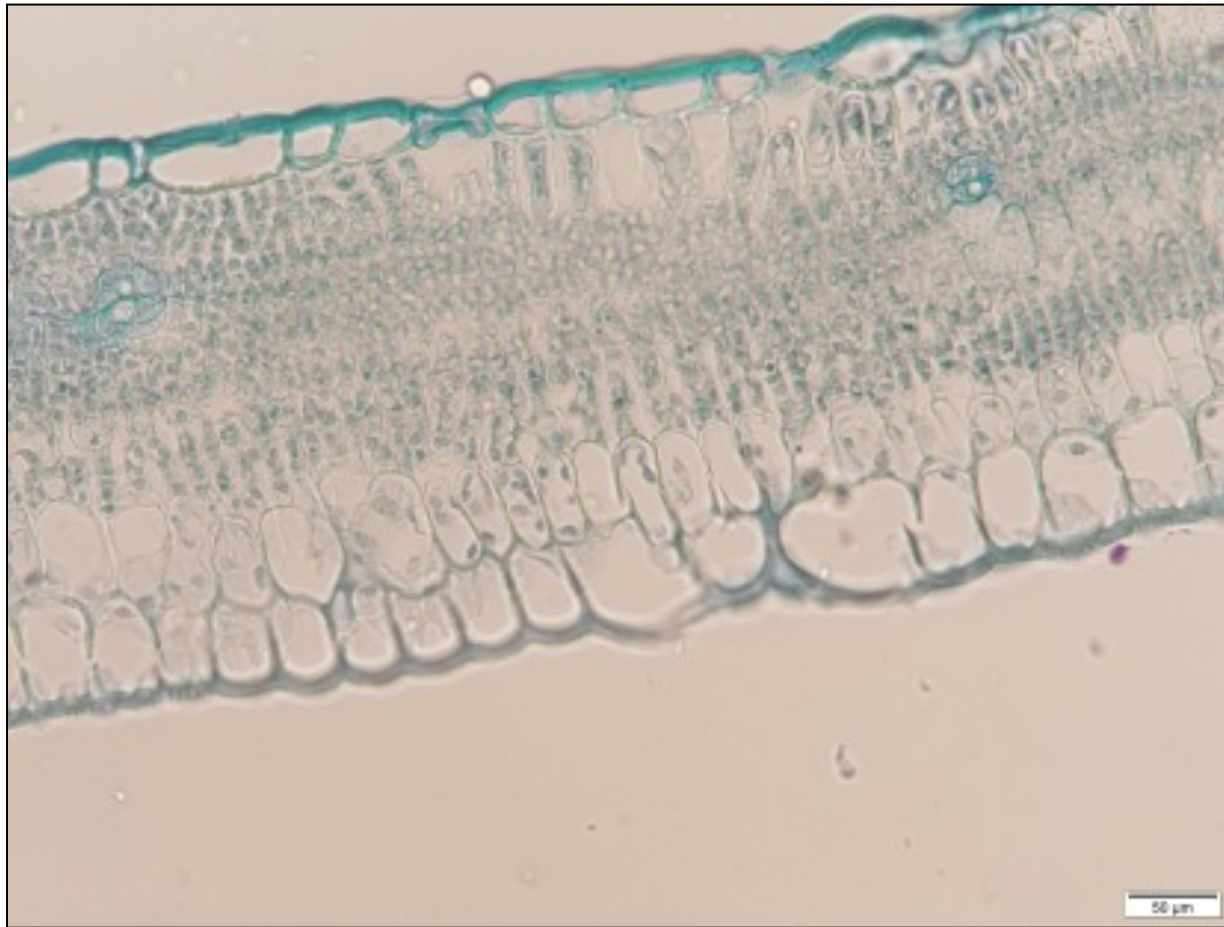

**BTx623**

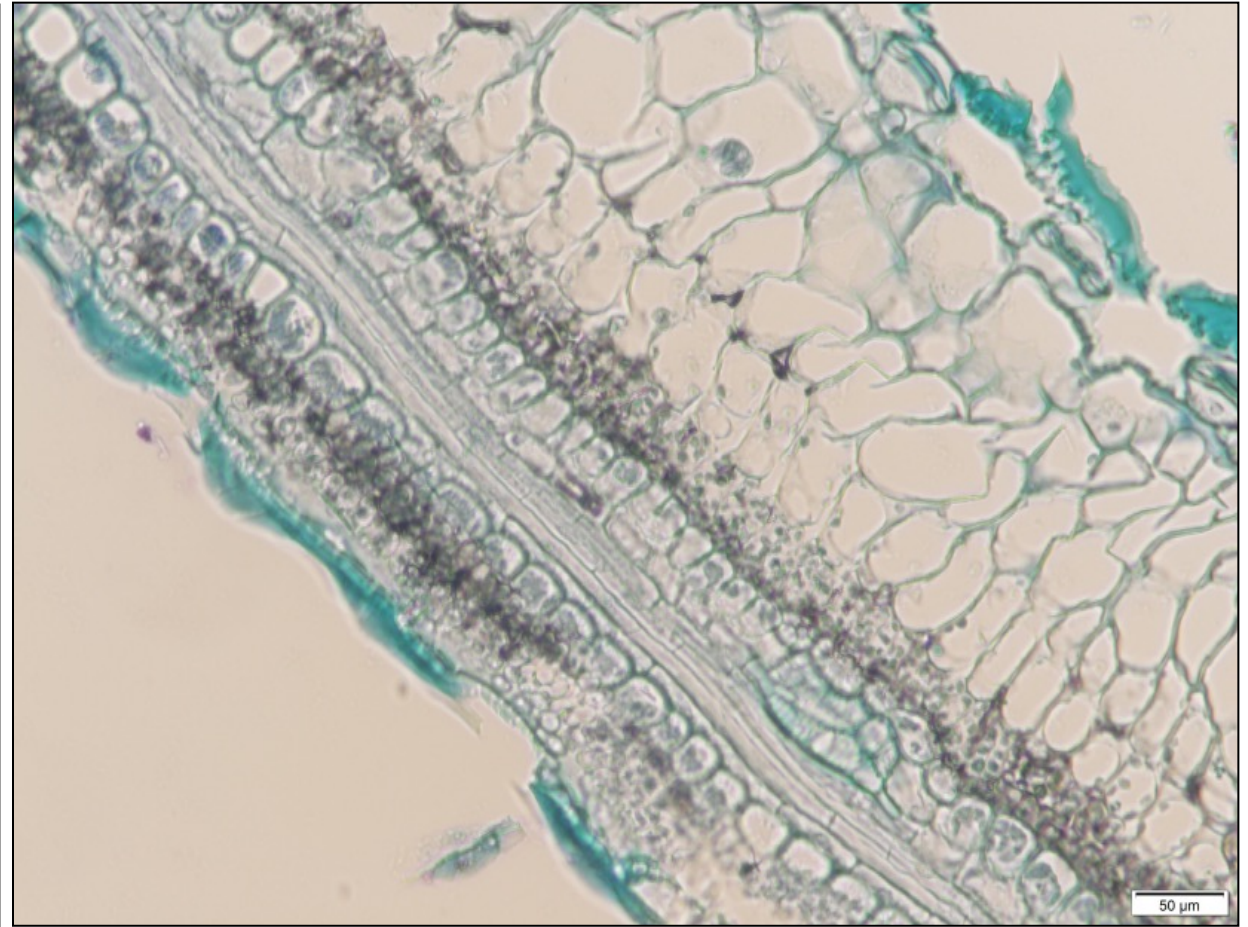

***thl1***

Supplementary Figure S3. Leaf cross section of BTx623 and *thl1* (Scale bar: 50 μm)

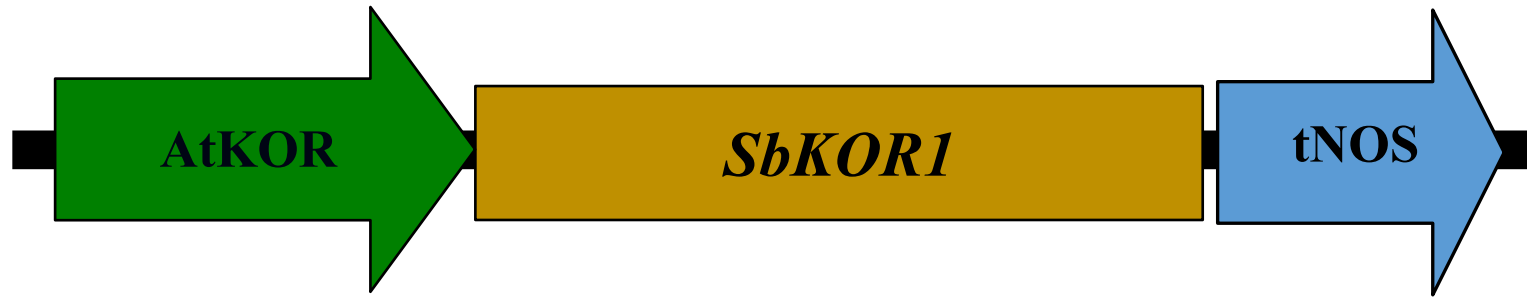

Complementation construct with native promoter

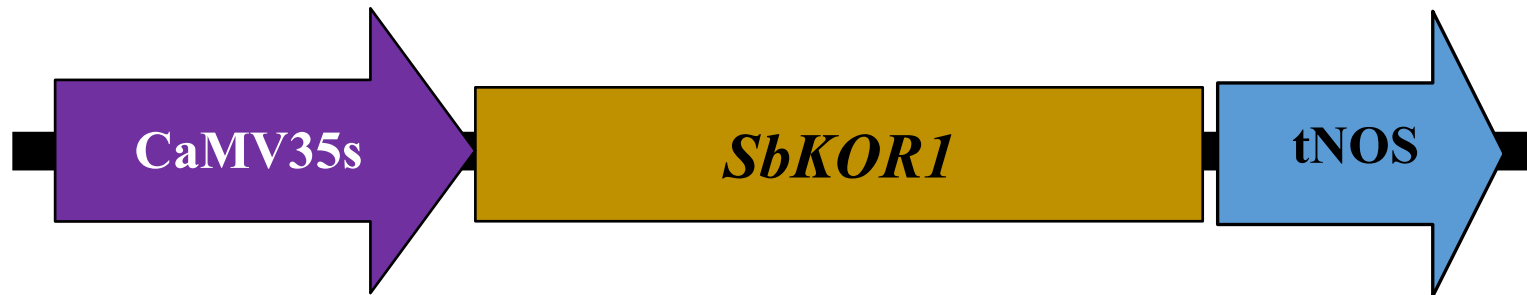

Over expression construct

Supplementary Figure S4. Vector construction maps.

Supplementary Table S1: Identification of mutant locus using BSaseq.

| <b>Mutant</b> | <b>Mutation</b>     | <b>Gene ID<br/>(Sorghum)</b> | <b>Gene ID<br/>(Arabidopsis)</b> | <b>Gene function</b>      | <b>Nature of the mutation</b>          |
|---------------|---------------------|------------------------------|----------------------------------|---------------------------|----------------------------------------|
| <i>thl1</i>   | 16QK6341<br>to 6352 | Sb01g036480                  | AT5G49720.1                      | glycosyl<br>hydrolase 9A1 | Chr01:60010687;Q46*;STOP_GAINED;homo   |
| <i>thl2</i>   | 16QK6353<br>to 6364 | Sb01g036480                  | AT5G49720.1                      | glycosyl<br>hydrolase 9A1 | Chr01:60010937;SPLICE SITE DONOR;;homo |
| <i>thl3</i>   | 16QK6365<br>to 6376 | Sb01g036480                  | AT5G49720.1                      | glycosyl<br>hydrolase 9A1 | Chr01:60010784;W78*;STOP_GAINED;homo   |



Supplementary Table S2: Primers used for experiments and sequence

| Primer number | Primer description       | Primer sequence                             |
|---------------|--------------------------|---------------------------------------------|
| 1465          | 1465_ACoa_Over_AscI F    | gggcGGCGCGCCATGTTAGAACTAACGAGCAAAAG         |
| 1466          | 1466_ACoa_Over_PacI R    | taaaAATTAATTTTCAGACACACCGGTGTGGAGAGTC       |
| 1520          | 1520_SbKOR1_AscI F       | gcttGGCGCGCCATGAGCATGTACGGGAGGGA            |
| 1521          | 1521_SbKOR1_PacI F       | ggccTTAATTAATTATGGTTTCCATGGGGCCG            |
| 1522          | 1522_At_KOR1prom_SBF1    | gcttCCTGCAGG TTTAGAGCTTGTAAGATCCTACAAC      |
| 1523          | 1523_At_KOR1prom_AscI    | gcttGGCGCGCC<br>ATATTTTTGGCCAACTATGATTGAGCG |
| 1590          | 1590_Atkori2-1_F_AscI    | gcttCGATGCTTTCAAGGCCAAAGAAC                 |
| 1591          | 1591_Atkori2-1_R_PacI    | ggccCGTCATCATCCTAAGACTCCGCC                 |
| 2274          | 2274_Kor_genotyping_F    | GTTGTTGGATGGATCATTCAAGG                     |
| 2275          | 2275_Kor_genotyping_R    | CAAAGACTCTTTGAGAGATCTGG                     |
| 2276          | 2276_rsw_genotyping_F    | GCTGGGACAACAAGCTTGCTGG                      |
| 2277          | 2277_rsw_genotyping_R    | CCATCCAGGAGTATCAGCAGC                       |
| 2303          | 2303_SbKOR1_AscI-FP      | aagggttGGCGCGCCgATGAGCATGTACGGGAGGGACCCG    |
| 2304          | 2304_SbKOR1_PacI-RP      | ggccggTTAATTAATTATGGTTTCCATGGGGCCGGTGGC     |
| 2305          | 2305_At_KOR1prom_SBF1-FP | gttccCCTGCAGGcgatgctttcaaggccaaagaac        |
| 2306          | 2306_At_KOR1prom_AscI-RP | caaggccGGCGCGCCgatgatgctctctgataaagc        |
| 708           | 708_qPCRSbKOR-F          | GATGAGACCAGAGGACATCGACT                     |
| 709           | 709_qPCRSbKOR-R          | CTTGCAAACCTGGAAGAGAGTGGT                    |
